# Supplementary material for: Circulating microRNAs Reveal Time Course of Organ Injury in a Porcine Model of Acetaminophen-Induced Acute Liver Failure
Source: PubMed Central journal article supplement (PMC4446266; doi:10.1371/journal.pone.0128076), 2015-05-27
Supplement: pone.0128076.s002.pdf [file pone.0128076.s002.pdf]

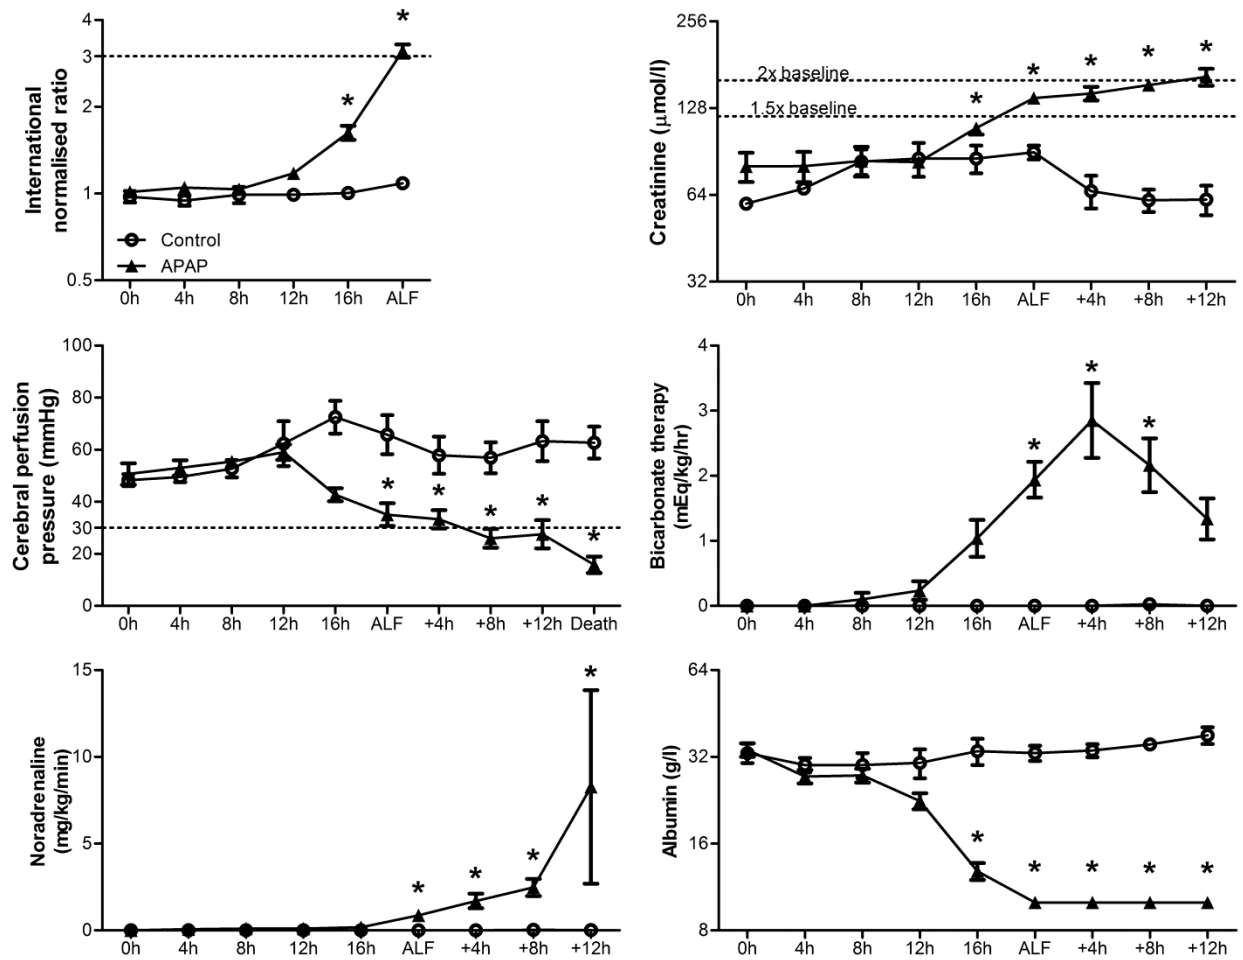

**S2 Fig. The six markers of ALF progression from the porcine model.** International normalised ratio, creatinine, cerebral perfusion pressure, bicarbonate therapy, noradrenaline therapy and albumin representing liver injury, kidney injury, brain injury acid-base imbalance, cardiovascular stability and vascular permeability respectively, reproduced in graphical form from Lee *et al* (2013). Values are means  $\pm$  SE; \*  $P < 0.05$  vs. control animals.
