# Supplementary material for: Circulating microRNAs Reveal Time Course of Organ Injury in a Porcine Model of Acetaminophen-Induced Acute Liver Failure
Source: PubMed Central journal article supplement (PMC4446266; doi:10.1371/journal.pone.0128076), 2015-05-27
Supplement: pone.0128076.s004.pdf [file pone.0128076.s004.pdf]

**S1 Table. Details of miRNA sequences and assays.** Names, RNA sequences, accession numbers and TaqMan MicroRNA Assay numbers (Applied Biosystems, Foster City, CA) for all the small RNA and miRNA used.

| Gene            | Sequence                | Accession Number   | Assay number (if inventoried) |
|-----------------|-------------------------|--------------------|-------------------------------|
| <b>snRNA:U6</b> | GTGCTCGCTTCGGCAGCACATA  | EU520423 & X59362* | Customised                    |
| <b>miR26a</b>   | UUCAAGUAAUCCAGGAUAGGCU  | MI0002429          | 000405                        |
| <b>miR191</b>   | CAACGGAAUCCCAAAGCAGCUG  | MI0013095          | 002299                        |
| <b>miR122</b>   | UGGAGUGUGACAAUGGUGUUUGU | MI0002413          | 000445                        |
| <b>miR192</b>   | CUGACCUAUGAAUUGACAGCC   | MI0013127          | 000491                        |
| <b>miR124-1</b> | UAAGGCACGCGGUGAAUGCCA   | MI0010680          | 000239                        |

\* Porcine snRNA:U6 is not fully sequenced, so by aligning the partial porcine sequence available with the human snRNA:U6 sequence (BLAST, NCBI, Bethesda, MD), a 22 nucleotide sequence was identified from which a customised assay was made (Applied Biosystems).
